# Supplementary material
Source: HighWire-hosted journal article supplement (https://bjsm.bmj.com/content/52/4/269)
Supplement: inline-supplementary-material-1 [file inline-supplementary-material-1.pdf]

Supplementary file 1: Participants baseline characteristics (n=1030)

| Factor                                                                                                                                                                                 | Category           | Mean (SD) | Number (%) |
|----------------------------------------------------------------------------------------------------------------------------------------------------------------------------------------|--------------------|-----------|------------|
| <b>Demographics, including self-rated pain and disability</b>                                                                                                                          |                    |           |            |
| Age (years)                                                                                                                                                                            |                    | 57 (15)   |            |
| Sex (male)                                                                                                                                                                             |                    |           | 455 (44)   |
| Index of multiple deprivation                                                                                                                                                          |                    | 15 (10)   |            |
| Baseline SPADI                                                                                                                                                                         |                    | 48 (22)   | 22         |
| Baseline QuickDASH                                                                                                                                                                     |                    | 38 (18)   | 18         |
| <b>Participants' pain beliefs, experience and expectations</b>                                                                                                                         |                    |           |            |
| Pain Self-Efficacy Questionnaire[23] 0-60, 60=greater efficacy,                                                                                                                        |                    | 44 (13)   | 13         |
| Physiotherapy for previous shoulder problems helpful                                                                                                                                   | Yes                |           | 137 (13)   |
|                                                                                                                                                                                        | In part            |           | 77 (8)     |
|                                                                                                                                                                                        | No                 |           | 35 (3)     |
|                                                                                                                                                                                        | Not applicable     |           | 781 (76)   |
| Physiotherapy for other health problems helpful                                                                                                                                        | Yes                |           | 372 (36)   |
|                                                                                                                                                                                        | In part            |           | 130 (13)   |
|                                                                                                                                                                                        | No                 |           | 54 (5)     |
|                                                                                                                                                                                        | Not applicable     |           | 474 (46)   |
| Patient perceived importance of physiotherapy in helping to gain maximum possible recovery (1-5 Likert scale, 1="Not at all" & 5= "Extremely")                                         | 5                  |           | 505 (49)   |
|                                                                                                                                                                                        | 4                  |           | 267 (26)   |
|                                                                                                                                                                                        | 3                  |           | 196 (19)   |
|                                                                                                                                                                                        | 2                  |           | 45 (4)     |
|                                                                                                                                                                                        | 1                  |           | 11 (1)     |
| Patient perceived confidence in their ability to manage shoulder symptoms with their physiotherapist (1-5 Likert scale, 1="Not at all" & 5= "Extremely")                               | 5                  |           | 465 (45)   |
|                                                                                                                                                                                        | 4                  |           | 317 (31)   |
|                                                                                                                                                                                        | 3                  |           | 193 (19)   |
|                                                                                                                                                                                        | 2                  |           | 41 (4)     |
|                                                                                                                                                                                        | 1                  |           | 8 (1)      |
| Patient readiness to work with the physiotherapist and do any prescribed exercises at home (1-5 Likert scale, 1="Not at all" & 5= "Extremely")                                         | 5                  |           | 824 (80)   |
|                                                                                                                                                                                        | 4                  |           | 166 (16)   |
|                                                                                                                                                                                        | 3                  |           | 32 (3)     |
|                                                                                                                                                                                        | 2 or 1             |           | <5 (10)    |
| Participant's response to "How much do you expect your shoulder problem to change as a result of physiotherapy treatment?" (7 point Likert scale)                                      | Completely recover |           | 246 (24)   |
|                                                                                                                                                                                        | Much improve       |           | 539 (52)   |
|                                                                                                                                                                                        | Slightly improve   |           | 197 (19)   |
|                                                                                                                                                                                        | No change          |           | 38 (4)     |
|                                                                                                                                                                                        | Worse (3 options)  |           | 9 (1)      |
| Physiotherapist's response to "How much do you expect this patient's current shoulder problem to change as a result of this course of physiotherapy treatment?" (7 point Likert scale) | Completely recover |           | 112 (11)   |
|                                                                                                                                                                                        | Much improve       |           | 571 (55)   |
|                                                                                                                                                                                        | Slightly improve   |           | 322 (31)   |
|                                                                                                                                                                                        | No change          |           | 21 (2)     |
|                                                                                                                                                                                        | Worse (3 options)  |           | 3 (<1)     |
| <b>General Health</b>                                                                                                                                                                  |                    |           |            |
| Body mass index, Mean (SD)                                                                                                                                                             |                    | 27 (5)    |            |
| Anxiety and depression in the previous seven days                                                                                                                                      | No                 |           | 657 (64)   |
|                                                                                                                                                                                        | Moderately         |           | 347 (34)   |
|                                                                                                                                                                                        | Extremely          |           | 26 (<3)    |
| Difficulty sleeping even if don't have shoulder pain                                                                                                                                   | No                 |           | 564 (55)   |

|                                                                                                                                                                                                                                                                      |                       |              |
|----------------------------------------------------------------------------------------------------------------------------------------------------------------------------------------------------------------------------------------------------------------------|-----------------------|--------------|
|                                                                                                                                                                                                                                                                      | Sometimes             | 385 (37)     |
|                                                                                                                                                                                                                                                                      | Most nights           | 81 (8)       |
| Musculoskeletal pain outside the affected upper quadrant:                                                                                                                                                                                                            | No                    | 787 (76)     |
| Includes opposite upper quadrant 110 (11%), trunk/abdomen 61 (6%), head/neck 107 (10%), lower limbs 38 (4%)                                                                                                                                                          | One additional site   | 185 (18)     |
|                                                                                                                                                                                                                                                                      | ≥2 additional sites   | 58 (65)      |
| Additional health problems.                                                                                                                                                                                                                                          | No                    | 551 (53)     |
| Includes heart 105 (10%), mental health 89 (9%), major operation 95 (9%), respiratory 93 (9%), diabetes 87 (8%), joint replacement 54 (5%), other 92 (9%). Each less than 50 (5%): epilepsy, cancer, rheumatic condition (shoulder unaffected), uncontrolled high BP | One additional        | 298 (29)     |
|                                                                                                                                                                                                                                                                      | ≥2 additional         | 181 (18)     |
| <b>Lifestyle</b>                                                                                                                                                                                                                                                     |                       |              |
| Smoker (cigarettes, cigars or pipe)                                                                                                                                                                                                                                  | Yes                   | 129 (13)     |
|                                                                                                                                                                                                                                                                      | Stopped last 10 years | 117 (11)     |
|                                                                                                                                                                                                                                                                      | Stopped > 10 years    | 261 (25)     |
|                                                                                                                                                                                                                                                                      | No, never             | 523 (51)     |
| Highest level of leisure time exercise intensity in a typical week* Godin leisure time exercise questionnaire[24]                                                                                                                                                    | Strenuous             | 222 (22)     |
|                                                                                                                                                                                                                                                                      | Moderate              | 333 (33)     |
|                                                                                                                                                                                                                                                                      | Mild                  | 348 (34)     |
|                                                                                                                                                                                                                                                                      | None                  | 124 (12)     |
| Frequency of regular activity long enough to build up a sweat                                                                                                                                                                                                        | Often                 | 211 (20)     |
|                                                                                                                                                                                                                                                                      | Sometimes             | 418 (41)     |
|                                                                                                                                                                                                                                                                      | Never/rarely          | 399 (39)     |
| Current frequency of pain medication                                                                                                                                                                                                                                 | None                  | 258 (25)     |
|                                                                                                                                                                                                                                                                      | Very occasional       | 360 (35)     |
|                                                                                                                                                                                                                                                                      | Most days &/or nights | 217 (21)     |
|                                                                                                                                                                                                                                                                      | Every day &/or night  | 195 (19)     |
| <b>Work</b>                                                                                                                                                                                                                                                          |                       |              |
| Currently off work due to shoulder pain                                                                                                                                                                                                                              | Yes                   | 18 (<2)      |
| Time off work due to shoulder pain in last year (days)                                                                                                                                                                                                               |                       | 127 (12)     |
| Time off work due to other health probs. in last 6 months (days)                                                                                                                                                                                                     |                       | 182 (18)     |
| Nature of employment                                                                                                                                                                                                                                                 | Employed/Education    | 599 (58)     |
|                                                                                                                                                                                                                                                                      | Retired               | 364 (36)     |
|                                                                                                                                                                                                                                                                      | Currently not working | 62 (6)       |
| Type of work or regular activity                                                                                                                                                                                                                                     | Overhead              | 358 358 (35) |
|                                                                                                                                                                                                                                                                      | Sedentary             | 391 391 (38) |
|                                                                                                                                                                                                                                                                      | Heavy manual          | 327 327 (32) |

\*Unit of measurement used for data analysis modified after data collection.
